# Supplementary material for: Functional and Biochemical Consequences of Disease Variants in Neurotransmitter Transporters: A Special Emphasis on Folding and Trafficking Deficits
Source: PubMed Central journal article supplement — Pharmacol Ther. Author manuscript; Available in PMC 2022 Feb 22. (PMC7612411; doi:10.1016/j.pharmthera.2020.107785), 2020-12-10
Supplement: EMS142927-supplement-Updated.pdf [file EMS142927-supplement-Updated.pdf]

## Update

# Pharmacology and Therapeutics

Volume 225, Issue , September 2021, Page

DOI: <https://doi.org/10.1016/j.pharmthera.2021.107816>

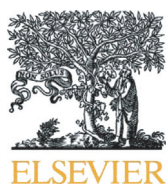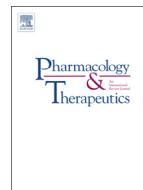

Corrigendum

Corrigendum to “Functional and Biochemical Consequences of Disease Variants in Neurotransmitter Transporters: A Special Emphasis on Folding and Trafficking Deficits” [Pharmacology & Therapeutics 222 (2021) 107785]

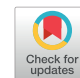

Shreyas Bhat, Ali El-Kasaby, Florian P. Fischer, Michael Freissmuth, Sonja Susic \*

*Institute of Pharmacology and the Gaston H. Glock Research Laboratories for Exploratory Drug Development, Center of Physiology and Pharmacology, Medical University of Vienna, Vienna A-1090, Austria*

The authors regret that Florian P. Fischer was omitted from the author list in the original version of this Article. The updated author list should be as above.

There was also an error in the acknowledgement. The updated acknowledgement should read as below.

**Acknowledgements**

The authors acknowledge the financial support by the Austrian Science Fund FWF (project P31255-B27) to SS and the Vienna Science and Technology Fund WWTF (LSC17-026) to MF. We are most grateful to Roshni Mathur for her assistance with figure preparation.

DOI of original article: <https://doi.org/10.1016/j.pharmthera.2020.107785>.

\* Corresponding author at: Institute of Pharmacology, Medical University of Vienna, Währingerstrasse 13A, Vienna A-1090, Austria.

*E-mail address:* [sonja.susic@meduniwien.ac.at](mailto:sonja.susic@meduniwien.ac.at) (S. Susic).

<https://doi.org/10.1016/j.pharmthera.2021.107816>

0163-7258/© 2021 The Author(s). Published by Elsevier Inc. All rights reserved.
